# Supplementary material for: A Geographically Weighted Random Forest Analysis of Spatial Non-Stationarity Association of Street View Environmental, Socioeconomic, and Lifestyle Factors with Type-2 Diabetes Prevalence in Toronto
Source: Research Square preprint supplement (doi:10.21203/rs.3.rs-5984185/v1), 2025-04-11
Supplement: Supplementary file 1 [file cee92f13f62eed9af7583572.docx]

**Appendix**


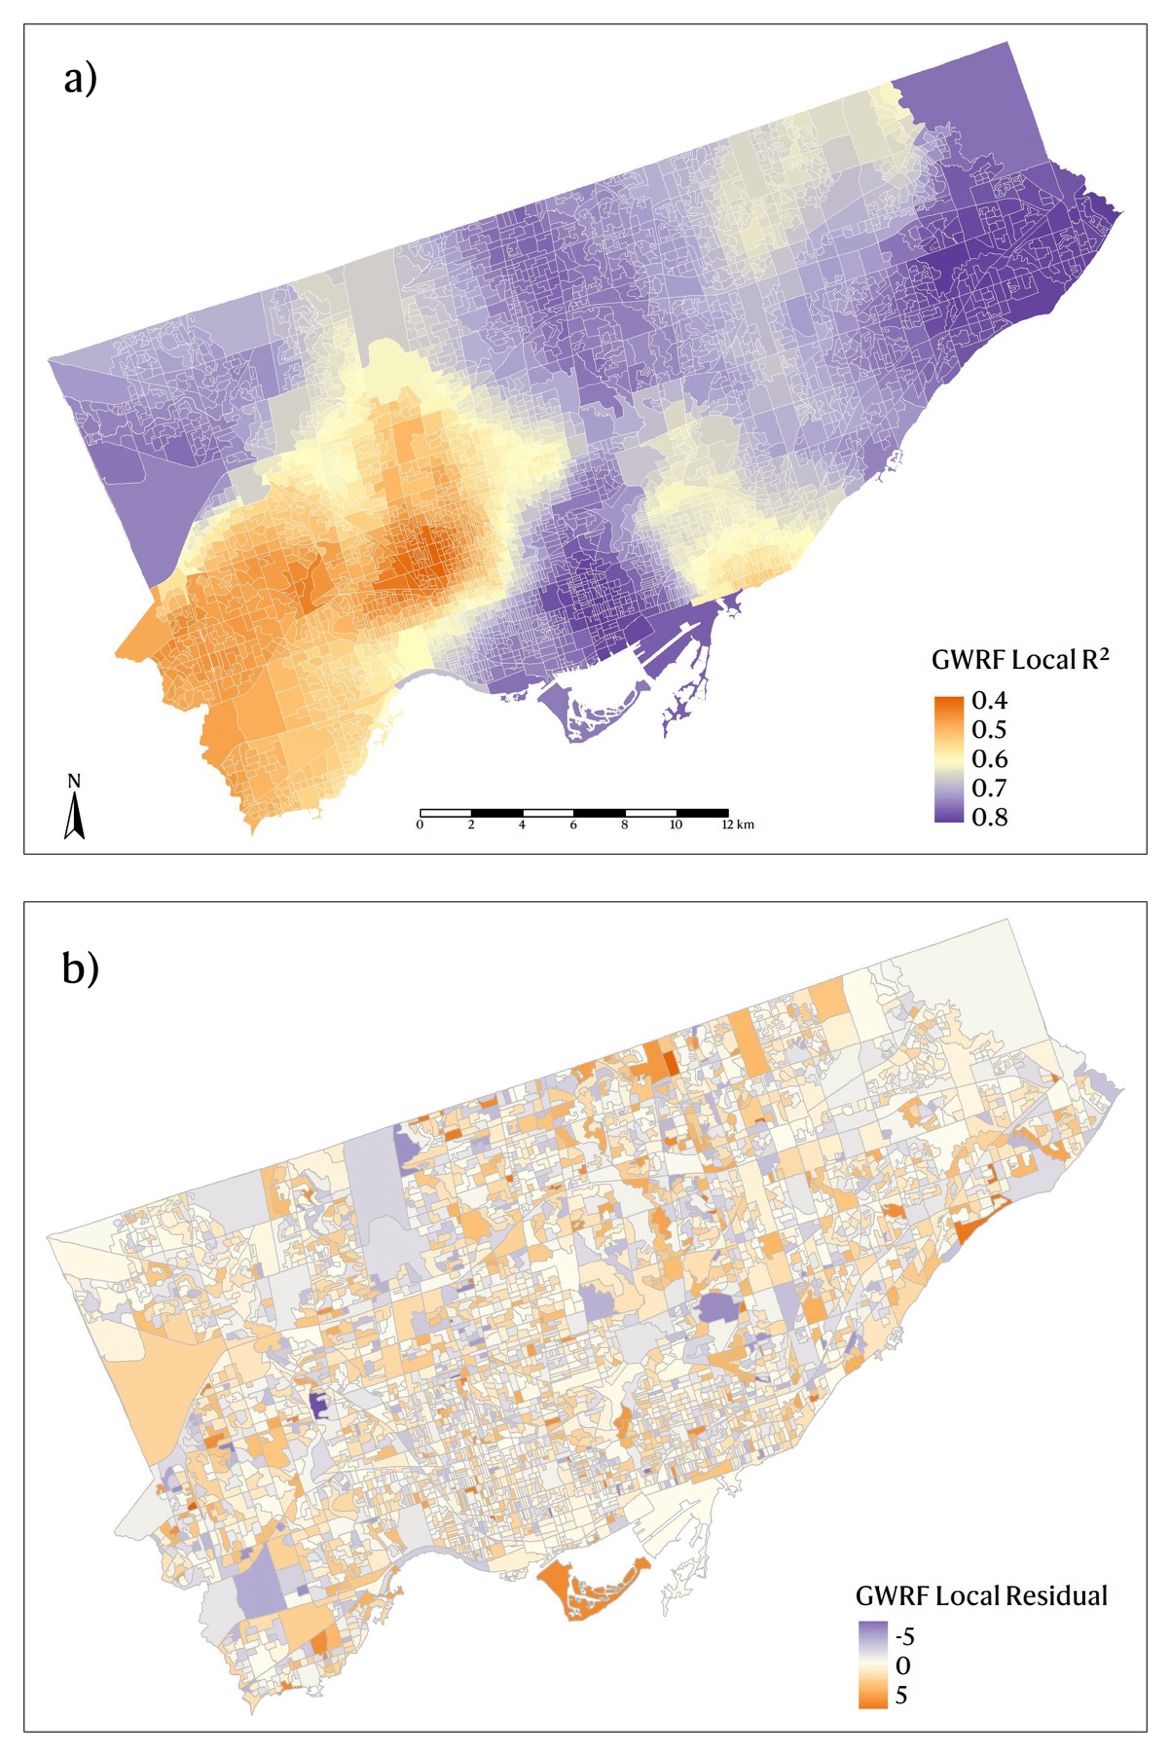


**Figure A1.** Local **a)** R2 and **b)** residual for the GWRF model

**Table A1**. Summary statistics for Permutation Feature Importance in the GWRF model ranked in descending order

| **Variable** | **Minimum** | **Maximum** | **Mean** | **Median** | **Standard Deviation** |
| --- | --- | --- | --- | --- | --- |
| Regular Health Care Provider | 0.3098 | 19.9401 | 4.8728 | 3.0992 | 4.2182 |
| Age | 0.3094 | 7.7573 | 2.2658 | 2.1236 | 1.3230 |
| Obesity Prevalence | 0.0453 | 8.3091 | 1.8776 | 0.9395 | 2.0244 |
| Smoking Rate | 0.1509 | 5.0895 | 1.4223 | 1.0395 | 1.0038 |
| Drinking Rate | 0.0379 | 6.1354 | 0.9436 | 0.6076 | 0.9423 |
| Life Dissatisfaction | 0.0649 | 3.6580 | 0.9085 | 0.5524 | 0.8317 |
| Poor Mental Health | 0.0054 | 3.9546 | 0.7829 | 0.5775 | 0.6297 |
| Anxiety Disorder Rate | 0.0296 | 2.6372 | 0.7208 | 0.6018 | 0.4523 |
| Median Income | 0.0340 | 4.3817 | 0.6423 | 0.4181 | 0.6579 |
| Non- Citizens | 0.0036 | 4.4265 | 0.5899 | 0.3083 | 0.6649 |
| Beauty and Safety Perception | -0.0386 | 4.3262 | 0.5690 | 0.3657 | 0.6416 |
| Weekly Physical Activity Minute | -0.0848 | 3.9135 | 0.4985 | 0.2745 | 0.6101 |
| Married or Common Law | 0.0326 | 2.0867 | 0.4917 | 0.3933 | 0.3106 |
| NDVI | -0.0237 | 2.1420 | 0.3897 | 0.2691 | 0.3401 |
| Immigrant Population | -0.0114 | 3.4557 | 0.3729 | 0.1556 | 0.5192 |
| Commute Duration | 0.0007 | 1.8438 | 0.3423 | 0.2811 | 0.2357 |
| Fence Density | -0.0269 | 1.8457 | 0.1868 | 0.1165 | 0.2219 |
| Commute by Transit | -0.0868 | 0.8894 | 0.1469 | 0.1086 | 0.1276 |
| Pole Density | -0.0974 | 0.9634 | 0.1159 | 0.0796 | 0.1326 |
| Without Certificate or Diploma | -0.0788 | 0.7283 | 0.1146 | 0.0807 | 0.1176 |
| Road Density | -0.0913 | 0.7261 | 0.1132 | 0.0722 | 0.1183 |
| Traffic Light Density | -0.0689 | 0.6142 | 0.0990 | 0.0787 | 0.0930 |
| Wall Density | -0.0379 | 0.5167 | 0.0695 | 0.0563 | 0.0628 |
| Unemployment Rate | -0.0432 | 0.3101 | 0.0668 | 0.0607 | 0.0439 |
| Cycling Network Density | -0.0711 | 0.3769 | 0.0616 | 0.0452 | 0.0612 |
| Water Body Density | -0.1704 | 0.3320 | 0.0491 | 0.0264 | 0.0617 |
| Commute by Walk or Cycle | -0.0426 | 0.2614 | 0.0266 | 0.0192 | 0.0335 |

**Table A2**. 10-fold spatial cross-validation result for GWRF

| **Fold** | **R2** | **RMSE** | **MAE** |
| --- | --- | --- | --- |
| 1 | 0.6785 | 2.3279 | 1.8078 |
| 2 | 0.7214 | 2.1673 | 1.6677 |
| 3 | 0.6516 | 2.2992 | 1.8188 |
| 4 | 0.7079 | 2.2521 | 1.7171 |
| 5 | 0.7128 | 2.1247 | 1.6644 |
| 6 | 0.7776 | 2.1805 | 1.7161 |
| 7 | 0.8183 | 2.2417 | 1.7575 |
| 8 | 0.7898 | 2.2276 | 1.7424 |
| 9 | 0.6786 | 2.2236 | 1.6794 |
| 10 | 0.6875 | 2.7253 | 2.0671 |
